# Supplementary material
Source: PubMed Central journal article supplement (PMC3055190)
Supplement: cc0921_4387SD1.pdf [file cc0921_4387SD1.pdf]

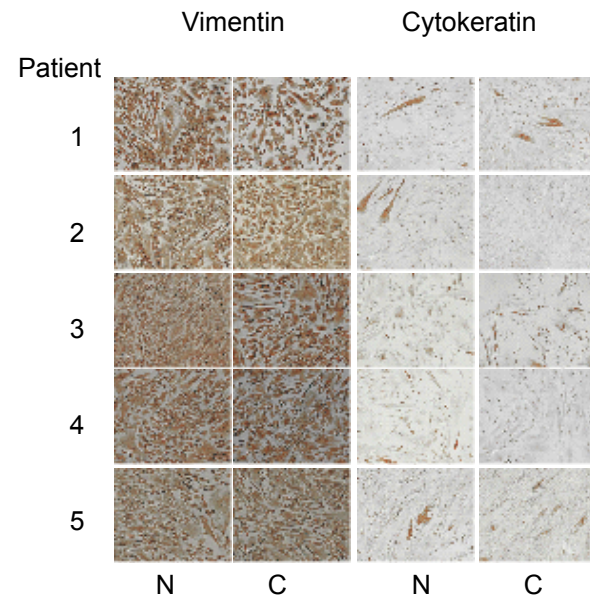

**Supplementary Fig. S1** Vimentin and cytokeratin staining of fibroblasts.

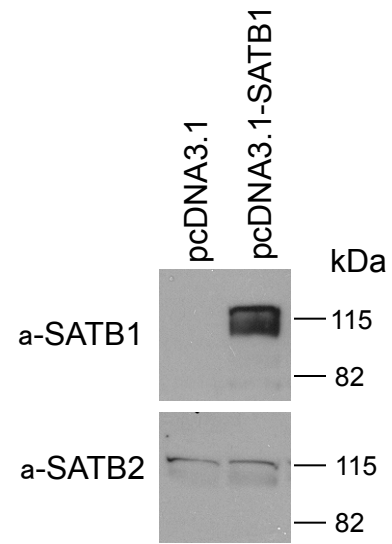

### Supplementary Fig. S2

SATB2 antibody specificity. Recombinant SATB1 protein or vector control were ectopically expressed in HeLa cells and protein lysates were analyzed by western blotting using anti-SATB1 or anti-SATB2 antibody.

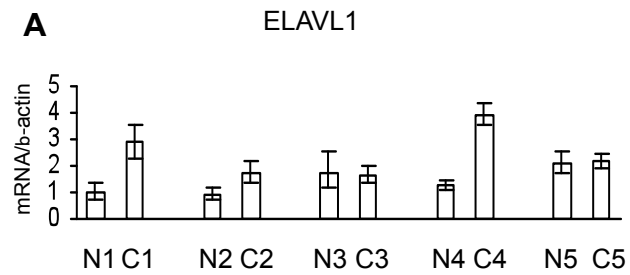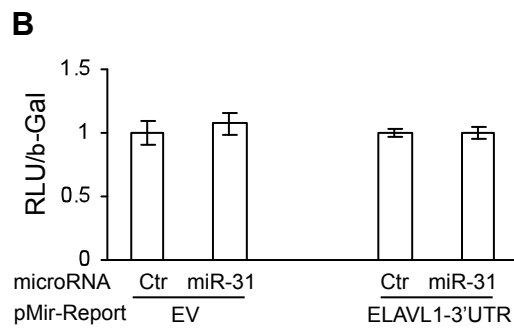

### Supplementary Fig. S3

ELAVL1 (HuR) is upregulated in the majority of CAFs but is not targeted by miR-31.

A. Quantitative RT-PCR of ELAVL1 in normal (N) fibroblasts and CAFs (C).

B. Luciferase reporter assay with pMIR-Report vector with or without 3'UTR of ELAVL1.
